# Supplementary material for: Effects of a Novel Applet-Based Personalized Dietary Intervention on Dietary Intakes: A Randomized Controlled Trial in a Real-World Scenario
Source: MDPI journal article supplement (doi:10.3390/nu16040565), 2024-02-19
Supplement: s1 [file s1]

**Table S1.** Comparison of baseline characteristics between the participants included and excluded.

|                                      | ALL        | Participants<br>included | Participants<br>excluded | P<br>value |
|--------------------------------------|------------|--------------------------|--------------------------|------------|
| n                                    | 177        | 153                      | 24                       |            |
| Age, years, mean (SD)                | 33.1 (7.8) | 32.7 (7.5)               | 35.7 (9.2)               | 0.081      |
| Sex, n (%)                           |            |                          |                          |            |
| Female                               | 101 (57.1) | 97 (63.4)                | 4 (16.7)                 | <0.001     |
| Male                                 | 76 (42.9)  | 56 (36.6)                | 20 (83.3)                |            |
| Smoking status, n (%)                |            |                          |                          |            |
| Non-smoker                           | 150 (84.7) | 136 (88.9)               | 14 (58.3)                | <0.001     |
| Ex-smoker                            | 14 (7.9)   | 11 (7.2)                 | 3 (12.5)                 |            |
| current Smoker                       | 13 (7.3)   | 6 (3.9)                  | 7 (29.2)                 |            |
| Alcohol consumption, n (%)           |            |                          |                          |            |
| Lifetime abstainer                   | 72 (40.7)  | 67 (43.8)                | 5 (20.8)                 | 0.001      |
| Non-heavy drinkers                   | 77 (43.5)  | 68 (44.4)                | 9 (37.5)                 |            |
| Heavy drinkers                       | 28 (15.8)  | 18 (11.8)                | 10 (41.7)                |            |
| Physical activity level, n (%)       |            |                          |                          |            |
| Low                                  | 154 (87.0) | 134 (87.6)               | 20 (83.3)                | 0.314      |
| Moderate                             | 21 (11.9)  | 18 (11.8)                | 3 (12.5)                 |            |
| High                                 | 2 (1.1)    | 1 (0.7)                  | 1 (4.2)                  |            |
| Intentional physical exercise, n (%) |            |                          |                          |            |
| No                                   | 135 (76.3) | 118 (77.1)               | 17 (70.8)                | 0.678      |
| Yes                                  | 42 (23.7)  | 35 (22.9)                | 7 (29.2)                 |            |
| Enrollment sequence, n (%)           |            |                          |                          |            |
| September                            | 23 (13.0)  | 23 (15.0)                | 0 (0.0)                  | 0.118      |
| October                              | 101 (57.1) | 86 (56.2)                | 15 (62.5)                |            |
| November                             | 53 (29.9)  | 44 (28.8)                | 9 (37.5)                 |            |

**Table S2** Effects of the intervention on average weekly dietary changes of lunch: Sensitivity analysis.

|                                       | Time × Group |       |
|---------------------------------------|--------------|-------|
|                                       | $\beta$      | p     |
| Food group, g/meal                    |              |       |
| Plant foods                           | 4.52         | 0.016 |
| Cereals and Tubers                    | 0.16         | 0.770 |
| Vegetables & Fruits                   | 4.41         | 0.015 |
| Soybeans and soybean products         | 0.03         | 0.878 |
| Animal foods                          | -1.86        | 0.093 |
| Livestock and poultry meat            | -1.99        | 0.061 |
| Aquatic products                      | 0.48         | 0.560 |
| Eggs and egg products                 | -0.68        | 0.130 |
| Animal / plant food ratio             | -0.03        | 0.002 |
| Energy, kcal/meal                     | -6.32        | 0.049 |
| Percentages of energy intake from fat | 0.00         | 0.575 |
| Nutrients                             |              |       |
| Protein, g/meal                       | -0.29        | 0.111 |
| Fat, g/meal                           | -0.39        | 0.077 |
| Carbohydrate, g/meal                  | -0.05        | 0.840 |
| Cholesterol, mg/meal                  | -5.21        | 0.027 |
| Sodium, mg /meal                      | -10.33       | 0.477 |
| Calcium, mg/meal                      | 1.69         | 0.347 |
| Iron, mg/meal                         | -0.06        | 0.266 |
| Zinc, mg/meal                         | 0.00         | 0.895 |
| Vitamin C, mg/meal                    | 0.34         | 0.348 |

NOTE: The significant interaction item (Time × Group) would indicate overall trend differences between the both groups; Model were adjusted for enrollment sequence, the dependent variables' baseline value, age, sex, baseline BMI, physical activity level, intentional physical exercise, smoking status and alcohol consumption; Model excluded participants who changed exercise routine or lunch dietary intake as a proportion of total daily dietary intake (n=20) at follow-up period;  $\beta$  value represented average weekly change in dietary intakes.

**Table S3.** Effects of the intervention on average monthly changes of anthropometric indicators: Sensitivity analysis.

|                            | Time × Group |        |
|----------------------------|--------------|--------|
|                            | $\beta$      | p      |
| Body weight, kg            | -0.449721    | 0.0035 |
| BMI, kg/m <sup>2</sup>     | -0.257566    | 0.0244 |
| Blood pressure, mmHg       |              |        |
| Systolic pressure          | -0.228722    | 0.8877 |
| Diastolic pressure         | 1.199244     | 0.1984 |
| Body composition           |              |        |
| Percentage of body fat, %  | -0.345244    | 0.4485 |
| Percentage of torso fat, % | -0.050636    | 0.9239 |
| Visceral fat index         | -0.192772    | 0.4045 |

NOTE: The significant interaction item (Time × Group) would indicate overall trend differences between the both groups; Model were adjusted for enrollment sequence, the dependent variables' baseline value, age, sex, physical activity level, intentional physical exercise, smoking status and alcohol consumption; Model excluded participants who changed exercise routine or lunch dietary intake as a proportion of total daily dietary intake (n=18) at follow-up period;  $\beta$  value represented average monthly change in anthropometric indicators.
